# Supplementary material for: Multiple Variants in Vascular Endothelial Growth Factor (VEGFA) Are Risk Factors for Time to Severe Retinopathy in Type 1 Diabetes
Source: Oxford University Press journal article supplement (doi:10.2337/db07-0376), 2007-07-27
Supplement: db070376onlineappendixtable2.xls [file db070376onlineappendixtable2.xls]

## Sheet: Sheet1
Online Appendix Table 2. Descriptive characteristics of relatives recruited
2394 white relatives of 975 white probands are in DCCT and EDIC.
	Parents		Sibilings
	Non-diabetic	Diabetic	Non-diabetic	Diabetic
Sex
Male (n=986)	373	119	396	98
Female (n=1336)	608	102	535	91
DCCT treatment Group
Intensive therapy (n=1198)	487	108	491	112
Conventional therapy (n=1082)	468	112	425	77
Classification of Diabetes
Type 1 Diabetes (n=127)	-	22	-	105
Type 2 Diabetes (n=268)	-	189	-	79
Study
DCCT family study (n=108)	-	63	-	45
DCCT and EDIC (n=127)	-	55	-	72
EDICgenetics study (n=2099)	981	103	942	72
ACR(mg/g)	16.33 ± 47.21	85.46 ± 297.14	8.43 ± 17.49	118.84 ± 589.02
AER (µg/min)	-	339.94 ± 985.85	-	196.97 ± 795.01
BMI (kg/m2)	28.64 ± 5.91	29.64 ± 6.02	28.33 ± 8.2	28.55 ± 6.20
Mean arterial blood pressure (mmHg)	96.14 ± 11.09	97.11 ± 12.59	91.54 ± 11.08	91.55 ± 11.20
Height (cm)	166.51 ± 9.63	169.30 ± 10.10	170.39 ± 11.27	171.31 ± 10.95
Weight (kg)	79.66 ± 18.87	85.04 ± 18.52	82.33 ± 20.13	84.38 ± 22.21
Total cholesterol (mg/dl)	202.41 ± 36.97	201.22 ± 48.88	198.62 ± 37.32	187.99 ± 38.00
HDL cholesterol (mg/dl)	52.67 ± 15.34	45.52 ± 15.22	50.44 ± 14.51	50.06 ± 16.20
Triglyceride (mg/dl)	140.35 ± 77.90	181.01 ± 130.57	134.15 ± 100.86	142.70 ± 136.94
ACR, Random Albumin;AER, albumin excretion rate
