# Supplementary material for: Multiple Variants in Vascular Endothelial Growth Factor (VEGFA) Are Risk Factors for Time to Severe Retinopathy in Type 1 Diabetes
Source: Oxford University Press journal article supplement (doi:10.2337/db07-0376), 2007-07-27
Supplement: db070376onlineappendixtable10.xls [file db070376onlineappendixtable10.xls]

## Sheet: Sheet1
Online Appendix Table 10. Univariate Cox proportional hazards single marker results for all retinal outcomes assuming additive
model. Major allele (or common homozygote) is used as baseline*
	≥ 3-Steps (Sample size=1181)				Severe Retinopathy (Sample size=1180)				Clinically Significant Macular Edema (Sample size=1181)
Marker	HR	95%CI	P vlaue		HR	95%CI	P vlaue		HR	95%CI	P vlaue
rs1547651	1.11953	0.97-1.30	0.13606		1.19483	0.92-1.55	0.177173		1.0302	0.79-1.34	0.822744
rs699947	1.01951	0.92-1.13	0.721628		0.888131	0.74-1.07	0.214556		0.972464	0.81-1.17	0.764927
rs2010963	0.946589	0.84-1.06	0.351309		1.09593	0.89-1.35	0.382083		1.04214	0.85-1.27	0.68816
rs3024987	1.12209	0.96-1.31	0.139359		1.15773	0.89-1.50	0.2713		1.13179	0.87-1.47	0.350064
rs833068	0.946116	0.84-1.06	0.345922		1.0798	0.88-1.33	0.464247		1.03745	0.85-1.27	0.72025
rs833070	1.02206	0.92-1.14	0.687727		0.8711	0.72-1.05	0.15018		0.974772	0.81-1.17	0.784495
rs3024994	0.889752	0.69-1.15	0.378714		1.08776	0.71-1.67	0.701836		0.800953	0.50-1.28	0.353044
rs2146323	1.00494	0.90-1.12	0.931401		0.863514	0.71-1.06	0.153655		0.935023	0.77-1.13	0.494746
rs3025007	0.992375	0.89-1.10	0.887357		0.800911	0.66-0.97	0.0233944		0.991875	0.82-1.20	0.931698
rs3025010	0.98292	0.88-1.10	0.763383		0.851022	0.70-1.04	0.113198		0.956873	0.79-1.16	0.651876
rs3025020	1.02116	0.91-1.15	0.720869		0.777159	0.63-0.96	0.0187145		0.939801	0.77-1.15	0.544947
rs3025021	1	0.89-1.12	0.999957		1.27182	1.04-1.55	0.016899		0.966572	0.79-1.18	0.740427
rs3025028	0.990845	0.88-1.11	0.873356		1.17798	0.97-1.43	0.101936		1.00627	0.83-1.22	0.949593
rs3025030	0.951306	0.81-1.11	0.537558		1.02308	0.76-1.37	0.878193		1.11987	0.85-1.47	0.414928
rs3025035	0.993736	0.81-1.22	0.952999		1.29541	0.94-1.79	0.118291		1.20992	0.87-1.68	0.254669
rs3025053	1.02725	0.87-1.21	0.750483		0.983829	0.73-1.33	0.916274		1.21768	0.92-1.60	0.161554
*Data is adjusted for cohort, treatment and cohort*treatment interaction. *HR = Hazard Ratio, 95%CI = Confidence Interval.
