# Supplementary material for: Multiple Variants in Vascular Endothelial Growth Factor (VEGFA) Are Risk Factors for Time to Severe Retinopathy in Type 1 Diabetes
Source: Oxford University Press journal article supplement (doi:10.2337/db07-0376), 2007-07-27
Supplement: db070376onlineappendixtable15.xls [file db070376onlineappendixtable15.xls]

## Sheet: Sheet1
Online-only Appendix Table 15. Results of Multi-SNP Model Comparisons
Model Comparison	Model		-2 log L	df	p-value		Model Comparison	Model		-2 log L	df	p-value		Model Comparison	Model		-2 log L	df	p-value
1 vs 2	1		1393.88	31			1 vs (*)	1		1393.88	31			(*) vs 9	(*)		1254.21	136
	2		1402.69	22				(*)		1254.21	136				9		1366.63	31
			8.811	9	0.4549					139.666	105	0.0133742					112.413	105	0.292622
1 vs 3	1		1393.88	31			1 vs 6	1		1393.88	31			8 vs 9	8		1359.44	36
	3		1419.32	18				6		1318.09	57				9		1366.63	31
			25.437	13	0.020212					75.789	26	9.19592e-07					7.192	5	0.206748
2 vs 3	2		1402.69	22			(*) vs 6	(*)		1254.21	136			2 vs 7	2		1402.69	22
	3		1419.32	18				6		1318.09	57				7		1318.34	56
			16.626	4	0.00228454					63.877	79	0.89174					84.35	34	3.64789e-06
2 vs 4	2		1402.69	22			6 vs 7	6		1318.09	57			2 vs 9	2		1402.69	22
	4		1375.31	37				7		1318.34	56				9		1366.63	31
			27.378	15	0.0258032					0.25	1	0.617075					36.064	9	3.86231e-05
2 vs 5	2		1402.69	22			1 vs 8	1		1393.88	31			5 vs 8	5		1382.9	25
	5		1382.9	25				8		1359.44	36				8		1359.44	36
			19.791	3	0.00018754					34.445	5	1.94143e-06					23.465	11	0.0151873
4 vs 5	4		1375.31	37			(*) vs 8	(*)		1254.21	136			5 vs 9	5		1382.9	25
	5		1382.9	25				8		1359.44	36				9		1366.63	31
			7.587	12	0.816515					105.221	100	0.340937					16.273	6	0.0123613
							(*) is model with 15 SNPs
							+ 105 Two-way interactions + 17 covariates
							(AIC value is 1524.215)
